# Supplementary material
Source: publisher site journal article supplement (http://edge.sagepub.com/sites/default/files/grubb_sample_report_supplementalburglary.pdf)
Supplement: Supplementary file 1 [file grubb_sample_report_supplementalburglary.pdf]

## SUPPLEMENTAL BURGLARY

---

On October 6, 2017, at 0925, I, Officer M. W. Jackson, was dispatched to 1313 Mockingbird Lane to a reported burglary. Upon my arrival, I met Officer Grubb and the victim, Mr. Phil Collins.

Officer Grubb showed me the two areas he believes may contain some physical evidence. I dusted the kitchen counter and recovered two latent prints. I also took photographs of the footprint on the door. During the course of looking around the backyard, I located a piece of paper with the name William Bonney and Bob's Motel.

I asked Mr. Collins if he knew a William Bonney. He stated, "No." I also asked him if he had any recent home repairs done. He again stated, "No." I finally asked if Mr. Bonney would have any reason to be inside his fenced-in backyard. And again, he replied, "No."

I advised Mr. Collins I would file my report, and a detective would contact him in reference to this offense. I cleared the scene.
